# Supplementary material
Source: ML conference proceedings conference paper supplement (https://proceedings.neurips.cc/paper_files/paper/2017/hash/4db0f8b0fc895da263fd77fc8aecabe4-Abstract.html)
Supplement: Supplementary file [file 4db0f8b0fc895da263fd77fc8aecabe4-Supplemental.zip]

## A Proof of the Main Results

In this section we prove the main results. We first prove that the proposed estimators achieve near-optimal statistical rates of convergence. Then we prove the supporting lemma on our data-driven approach of truncation.

### A.1 Proof of Theorem 3.2

*Proof.* We denote by  $\widehat{W}$  the solution of the convex program in (3.3). Also, let  $W^* = \beta^* \beta^{*\top}$ . In the following, we establish an upper bound for  $\|\widehat{W} - W^*\|_2$ .

Since  $W^*$  is feasible for the optimization problem in (3.3), we have

$$\langle \widehat{W}, \widetilde{\Sigma} \rangle - \lambda \|\widehat{W}\|_1 \geq \langle W^*, \widetilde{\Sigma} \rangle - \lambda \|W^*\|_1. \quad (\text{A.1})$$

We denote  $\Sigma^* = \mathbb{E}[Y \cdot T(X)]$ . Note that  $\beta^*$  is the leading eigenvector of  $\Sigma^*$ . Then (A.1) is equivalent to

$$\langle \widehat{W} - W^*, \widetilde{\Sigma} - \Sigma^* \rangle - \lambda \|\widehat{W}\|_1 + \lambda \|W^*\|_1 \geq \langle \Sigma^*, W^* - \widehat{W} \rangle. \quad (\text{A.2})$$

The following Lemma in [33] establishes an upper bound for the first term on the left-hand side of (A.2).

**Lemma A.1.** Let  $\Omega \in \mathbb{R}^{d \times d}$  be a symmetric matrix and let  $\lambda_1 \geq \lambda_2 \geq \dots \geq \lambda_d$  the eigenvalues of  $\Omega$  in descending order. For any  $\ell \in [d-1]$  such that  $\lambda_\ell - \lambda_{\ell+1} > 0$ , let  $\Pi_\ell \in \mathbb{R}^{d \times d}$  be the projection matrix for the subspace spanned by the eigenvectors of  $\Omega$  corresponding to  $\lambda_1, \dots, \lambda_\ell$ . Then for any  $\Lambda \in \mathbb{R}^{d \times d}$  satisfying  $0 \preceq \Lambda \preceq I_d$  and  $\text{Trace}(\Lambda) = k$ , we have

$$(\lambda_\ell - \lambda_{\ell+1}) \cdot \|\Pi_k - \Lambda\|_F^2 \leq 2\langle \Omega, \Pi_k - \Lambda \rangle.$$

Note that  $W^*$  is the projection matrix for the subspace spanned by  $\beta^*$ . Applying Lemma A.1 to  $\Sigma^*$  with  $\ell = 1$ , we have

$$\langle \Sigma^*, W^* - \widehat{W} \rangle \geq C_0/2 \cdot \|\widehat{W} - W^*\|_F^2, \quad (\text{A.3})$$

where  $C_0 > 0$  is defined in (3.2). In addition, by Hölder's inequality, we have

$$\langle \widehat{W} - W^*, \widetilde{\Sigma} - \Sigma^* \rangle \leq \|\widetilde{\Sigma} - \Sigma^*\|_\infty \cdot \|\widehat{W} - W^*\|_1. \quad (\text{A.4})$$

In what follows, we bound  $\|\widetilde{\Sigma} - \Sigma^*\|_\infty$ .

**Lemma A.2.** Let  $\widetilde{\Sigma}$  be defined in (3.5) and we define  $\Sigma^* = \mathbb{E}[Y \cdot T(X)]$ . Under Assumption 3.1, for any truncation level  $\tau > 0$  in (3.4), with probability at least  $1 - d^{-2}$ , we have

$$\|\widetilde{\Sigma} - \Sigma^*\|_\infty \leq 9M \cdot \tau^{-3} + 2\tau^3 \cdot \log d/n + 2\sqrt{5M \cdot \log d/n}. \quad (\text{A.5})$$

*Proof.* See §A.3 for a detailed proof.  $\square$

By this lemma, if we set  $\tau = (1.5Mn/\log d)^{1/6}$ , then with probability at least  $1 - d^{-1}$ ,

$$\|\widetilde{\Sigma} - \Sigma^*\|_\infty \leq (2\sqrt{5} + 2\sqrt{6}) \cdot \sqrt{M \log d/n} \leq 10\sqrt{M \log d/n}. \quad (\text{A.6})$$

Thus by setting  $\lambda = 10\sqrt{M \log d/n}$  we have  $\|\widetilde{\Sigma} - \Sigma^*\|_\infty \leq \lambda$  with probability at least  $1 - d^{-2}$ .

Then combining (A.2), (A.3), and (A.4) we have

$$\lambda \left( \|\widehat{W} - W^*\|_1 - \|\widehat{W}\|_1 + \|W^*\|_1 \right) \geq C_0/2 \cdot \|\widehat{W} - W^*\|_F^2. \quad (\text{A.7})$$

Note that  $W^* = \beta^* \beta^{*\top}$  and that  $\beta^*$  is  $s^*$ -sparse. We denote the support of  $W^*$  by  $\mathcal{J}$ , which is given by

$$\mathcal{J} = \{(j, k) \in [d] \times [d] : \beta_j^* \cdot \beta_k^* \neq 0\}.$$

Then by separation of the  $\ell_1$ -norm, we have

$$\|\widehat{W}\|_1 = \|\widehat{W}_{\mathcal{J}}\|_1 + \|\widehat{W}_{\mathcal{J}^c}\|_1 \quad \text{and} \quad \|\widehat{W} - W^*\|_1 = \|\widehat{W}_{\mathcal{J}} - W_{\mathcal{J}}^*\|_1 + \|\widehat{W}_{\mathcal{J}^c}\|_1,$$
